# Supplementary material
Source: PubMed Central journal article supplement (PMC2994339)
Supplement: JCI43127sd.pdf [file JCI43127sd.pdf]

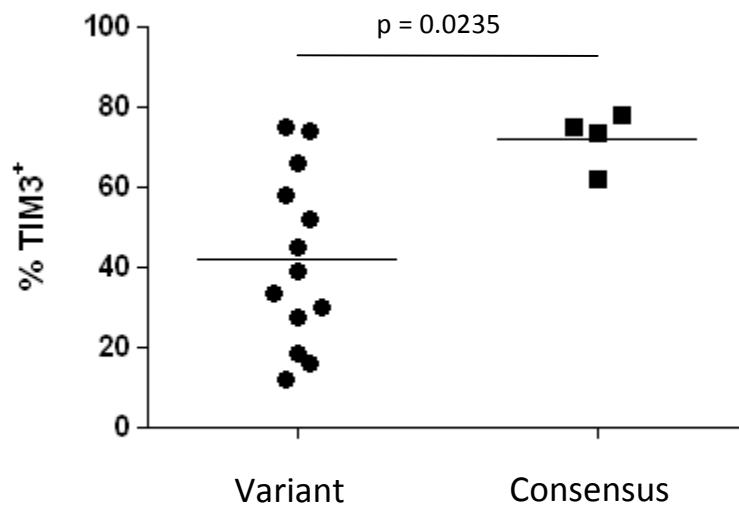

**Supplemental Figure 1. Expression of Tim-3 on HCV-specific CTLs is lower in patients demonstrating viral variants.** PBMC from HCV genotype 1a patients were stained with anti-CD8, anti-Tim3 and HCV-specific pentamers (HLA-A2<sub>1406</sub>, HLA-A2<sub>2594</sub> and HLA-A1<sub>1436</sub>) and assessed by flow cytometry for the percentage of HCV-specific T cells expressing Tim-3. Autologous viral sequences of the CTL epitopes were compared to the consensus H77 genotype 1a sequence. The percentage of HCV-specific T cells expressing Tim-3 is higher if the virus contains the HCV consensus sequence for that epitope ( $p=0.0235$ ).

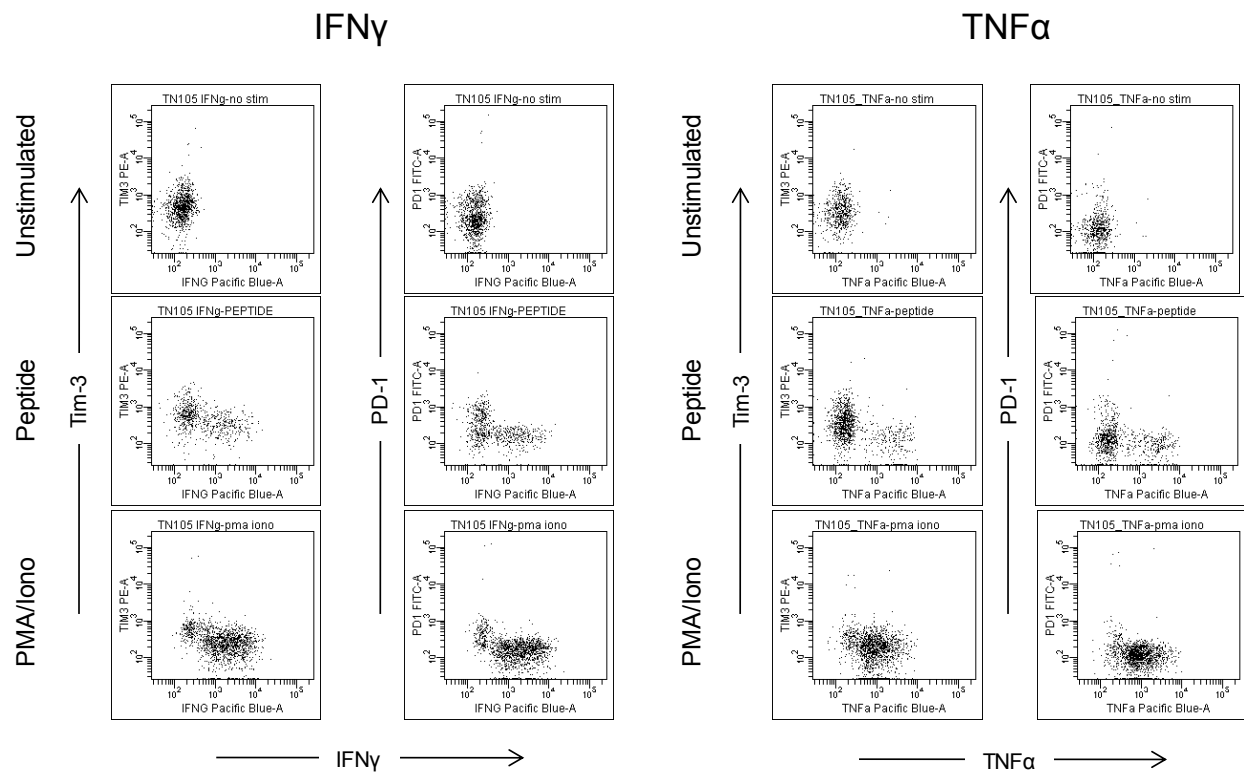

**Supplemental Figure 2. PD-1<sup>+</sup> and Tim-3<sup>+</sup> T cells are functionally impaired.**

PBMCs from an acutely infected HCV patient who became chronic were stimulated with the HLA-A1 restricted NS3<sub>1436</sub> epitope or PMA and Ionomycin for 5 hours in the presence of CD107a antibody. Cell surface staining for CD3, CD8, HLA-A1<sub>1436</sub> pentamer, Tim-3 and PD-1 was carried out followed by intracellular cytokine staining for IFN $\gamma$  and TNF $\alpha$ . Flow cytometric analysis was used to determine the proportions of the Tim-3-positive and PD-1-positive cells producing IFN $\gamma$  and TNF $\alpha$  after stimulation.

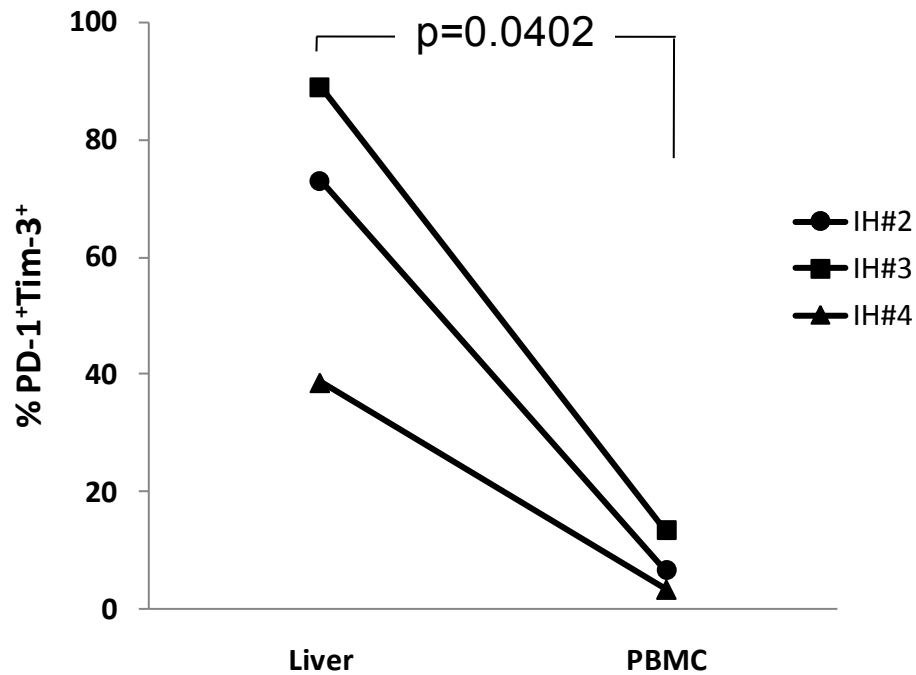

**Supplemental Figure 3. HCV-specific T cells in the intrahepatic compartment express higher levels of Tim-3 than paired peripheral blood.** Intrahepatic lymphocytes and matched PBMC from 3 patients were stained with antibodies against CD3, CD8 and Tim-3. A higher percentage of CD8 T cells in the liver expressed Tim-3 compared to peripheral CD8 T cells ( $p=0.0402$ ).

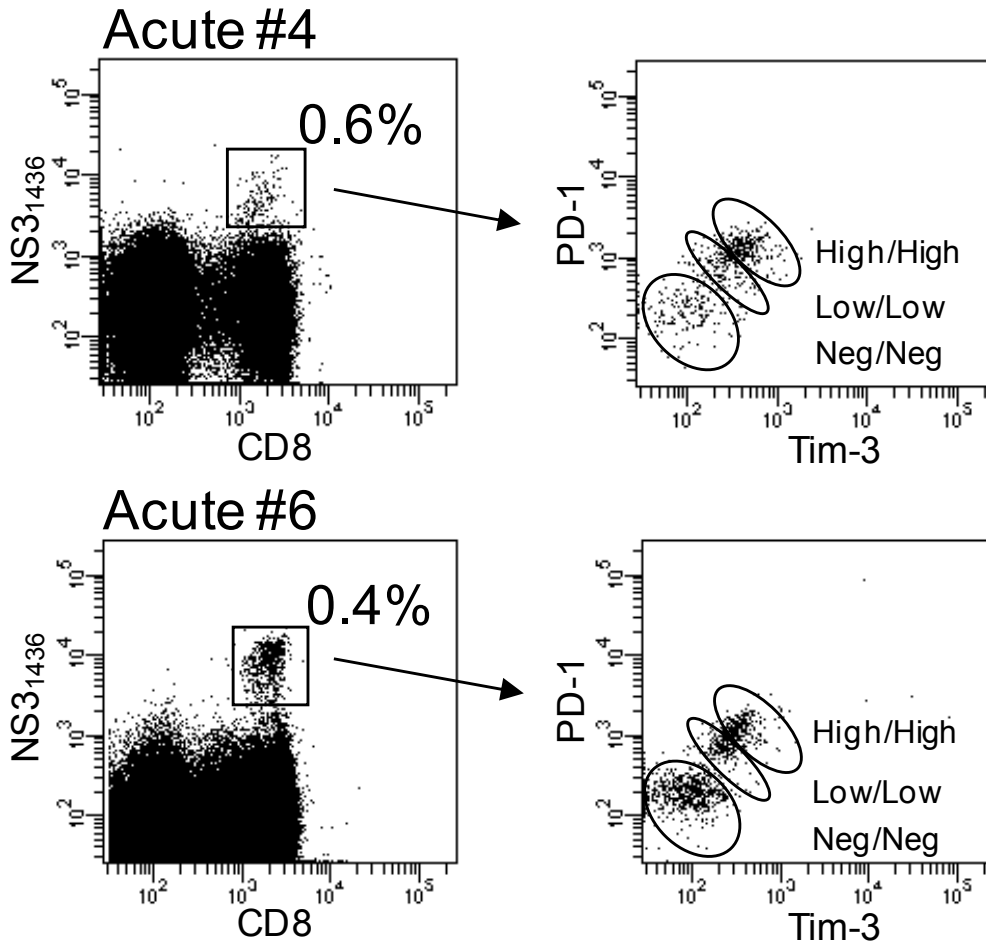

**Supplemental Figure 4. Pentamer frequencies and PD-1/Tim-3 expression for Acutes #4 and #6.** PBMC from two acutely infected patients who became chronically infected (Acute #4 and Acute #6) were stained with antibodies against CD3, CD8, PD-1 Tim-3 and the A1<sub>1436</sub> pentamer and the percentage of CD8 T cells binding pentamer was determined. Gating of pentamer-positive T cells on Tim-3<sup>high</sup>/PD-1<sup>high</sup>, Tim-3<sup>low</sup>/PD-1<sup>low</sup> and Tim-3<sup>neg</sup>/PD-1<sup>neg</sup> is shown.

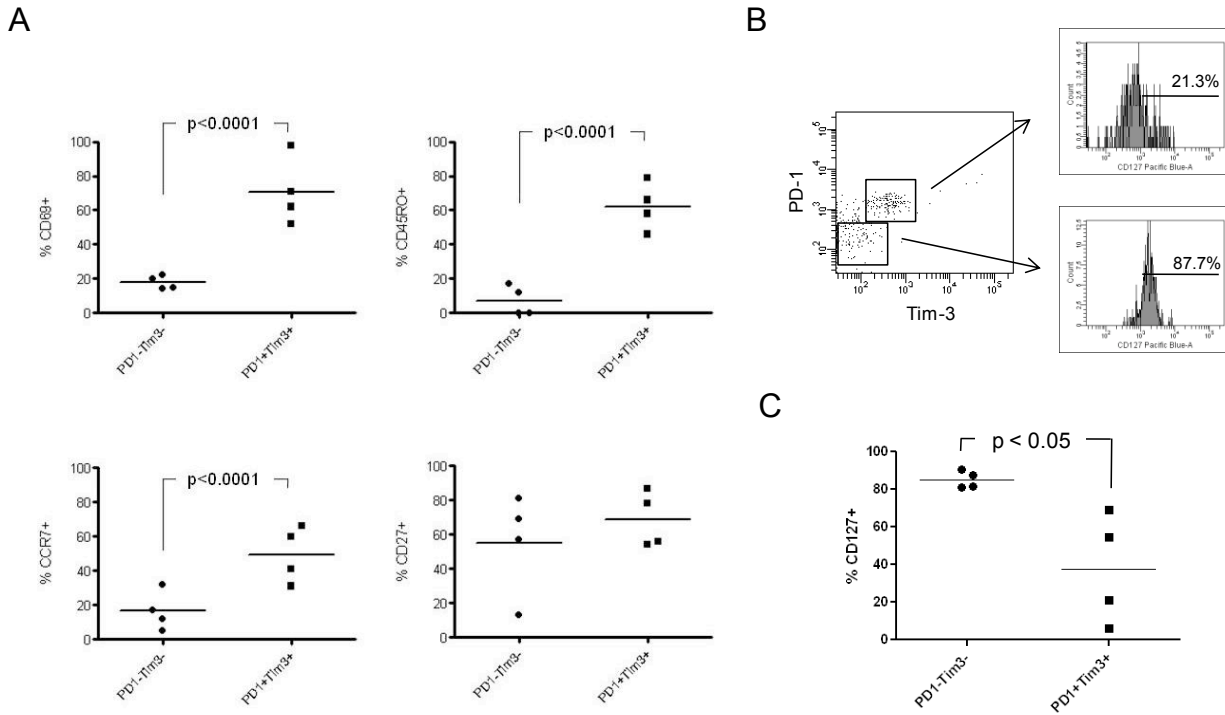

**Supplemental Figure 5. Phenotypic analysis of CD4, CD8 and HCV-specific T**

**cells from chronically infected HCV patients.** PD-1<sup>+</sup> and Tim-3<sup>+</sup> HCV-specific T

cells from acutely infected patients who became chronic were identified by staining with

anti-CD8 and the A1<sub>1436</sub> pentamer. (A) The phenotype of the cells was determined by

staining with antibodies against PD-1, Tim-3, CCR7, CD27 CD69 and CD45RO and the

expression of the activation/memory markers on the dual PD-1<sup>+</sup>TIM3<sup>+</sup> positive cells was

compared to cells negative for PD-1 and Tim-3. A significant portion of the dual positive

T cells expressed CCR7, CD69 and CD45RO relative to PD-1<sup>-</sup>Tim-3<sup>-</sup> cells (\* p <

0.0001), The majority of HCV-specific T cells were CD45RA- (data not shown) . (B and

C) HCV-specific T cells were further analysed for CD127 expression on PD-1<sup>+</sup>Tim-3<sup>+</sup>

and PD-1<sup>-</sup>Tim-3<sup>-</sup> cells. Representative plots from one patient are shown in (B). PD-

1<sup>+</sup>Tim-3<sup>+</sup> HCV-specific T cells had lower levels of CD127 compared to PD-1<sup>+</sup>Tim-3<sup>+</sup>

(p=.0465). Horizontal bars represent the mean.

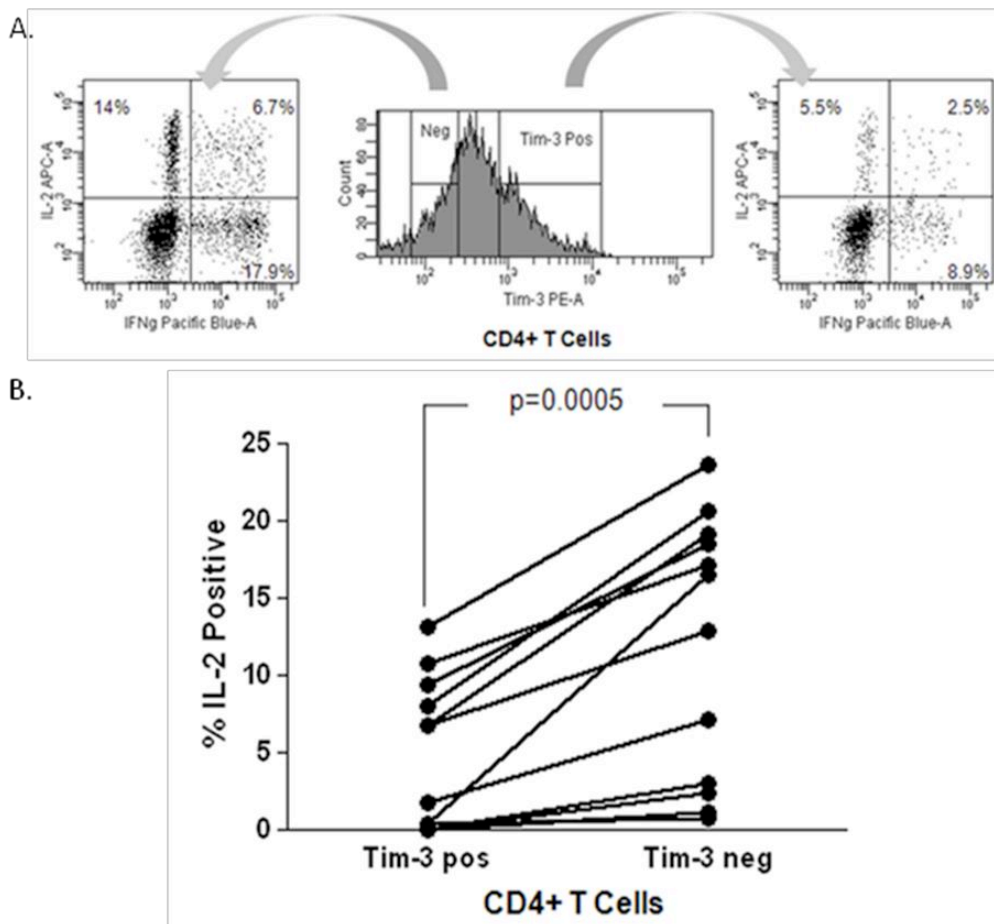

**Supplementary Figure 6. Tim-3 positive helper T cells produce less IL-2.** PBMCs from twelve subjects, six uninfected controls and six acute to chronic HCV infection patients (12-18 months post-infection), were stimulated for four hours with PMA and Ionomycin in the presence of brefeldin A to inhibit cytokine secretion. Cell surface staining was carried out for CD3, CD4 and Tim-3, followed by intracellular staining for IL-2. (A) Flow cytometric analysis was used to determine the proportions of the Tim-3-positive and –negative subsets of CD4 T cells producing IL-2 after brief stimulation. (B) Tim-3-positive helper T-cells produce less IL-2 than their Tim-3-negative counterparts. We did not find that in vitro stimulation for 6 hrs affected Tim-3 expression on CD4+ T cells (data not shown).

Supplemental Table 1: MHC Class I Pentamers

| Protein    | HLA<br>Restriction | Amino<br>Acids | Sequence   |
|------------|--------------------|----------------|------------|
| HCV:NS3-5H | A2                 | 1406-1415      | KLVALGINAV |
| HCV:NS3-5H | A1                 | 1436-1444      | ATDALMTGY  |
| HCV:NS3-1P | A2                 | 1073-1081      | CINGVCWTV  |
| HCV:NS5-B2 | A2                 | 2594-2602      | ALYDVVTKL  |
| CMV:pp65   | A2                 | 495-503        | NLVPMVATV  |
